# Supplementary material for: Factors associated with hospital admission and critical illness among 5279 people with coronavirus disease 2019 in New York City: prospective cohort study
Source: PubMed Central journal article supplement — BMJ. 2020 May 22;369:m1966. doi: 10.1136/bmj.m1966 (PMC7243801; doi:10.1136/bmj.m1966), 2020-05-22
Supplement: petc057265.ww.pdf [file petc057265.ww.pdf]

**Appendix Table S1: Characteristics of patients by test outcome\***

| <b>Characteristic</b>                            | <b>All tested, N=10,620<br/>N (column %) or median<br/>(IQR)</b> | <b>Tested negative, N=5,341<br/>N (column %) or median<br/>(IQR)</b> | <b>Tested positive,<br/>N=5,279<br/>N (column %) or<br/>median (IQR)</b> |
|--------------------------------------------------|------------------------------------------------------------------|----------------------------------------------------------------------|--------------------------------------------------------------------------|
| <b>Age, years</b>                                |                                                                  |                                                                      |                                                                          |
| 19-44                                            | 4606 (43.4)                                                      | 2760 (51.7)                                                          | 1846 (35.0)                                                              |
| 45-54                                            | 1819 (17.1)                                                      | 917 (17.2)                                                           | 902 (17.1)                                                               |
| 55-64                                            | 1893 (17.8)                                                      | 872 (16.3)                                                           | 1021 (19.3)                                                              |
| 65-74                                            | 1214 (11.4)                                                      | 417 (7.8)                                                            | 797 (15.1)                                                               |
| ≥75                                              | 1088 (10.2)                                                      | 375 (7.0)                                                            | 713 (13.5)                                                               |
| Male                                             | 4366 (41.1)                                                      | 1751 (32.8)                                                          | 2615 (49.5)                                                              |
| <b>Race/ethnicity</b>                            |                                                                  |                                                                      |                                                                          |
| Non-Hispanic white                               | 4451 (41.9)                                                      | 2448 (45.8)                                                          | 2003 (37.9)                                                              |
| Non-Hispanic African American                    | 1492 (14.0)                                                      | 657 (12.3)                                                           | 835 (15.8)                                                               |
| Asian                                            | 927 (8.7)                                                        | 544 (10.2)                                                           | 383 (7.3)                                                                |
| Hispanic                                         | 2233 (21.0)                                                      | 903 (16.9)                                                           | 1330 (25.2)                                                              |
| Other/ Multiracial                               | 788 (7.4)                                                        | 391 (7.3)                                                            | 397 (7.5)                                                                |
| Unknown                                          | 729 (6.9)                                                        | 398 (7.5)                                                            | 331 (6.3)                                                                |
| <b>Tobacco use</b>                               |                                                                  |                                                                      |                                                                          |
| Current                                          | 6722 (63.3)                                                      | 3454 (64.7)                                                          | 3268 (61.9)                                                              |
| Former                                           | 1718 (16.2)                                                      | 816 (15.3)                                                           | 902 (17.1)                                                               |
| Never, including passive exposure                | 829 (7.8)                                                        | 541 (10.1)                                                           | 288 (5.5)                                                                |
| Unknown                                          | 1351 (12.7)                                                      | 530 (9.9)                                                            | 821 (15.6)                                                               |
| <b>Obesity</b>                                   |                                                                  |                                                                      |                                                                          |
| BMI <25 kg/m <sup>2</sup>                        | 3468 (32.7)                                                      | 2062 (38.6)                                                          | 1406 (26.6)                                                              |
| BMI 25.0-29.9 kg/m <sup>2</sup>                  | 3388 (31.9)                                                      | 1619 (30.3)                                                          | 1769 (33.5)                                                              |
| BMI 30.0-39.9 kg/m <sup>2</sup>                  | 2768 (26.1)                                                      | 1214 (22.7)                                                          | 1554 (29.4)                                                              |
| BMI ≥40 kg/m <sup>2</sup>                        | 526 (5.0)                                                        | 215 (4.0)                                                            | 311 (5.9)                                                                |
| Unknown                                          | 470 (4.4)                                                        | 231 (4.3)                                                            | 239 (4.5)                                                                |
| <b>Any chronic condition</b>                     |                                                                  |                                                                      |                                                                          |
| Any cardiovascular condition                     | 6105 (57.5)                                                      | 2782 (52.1)                                                          | 3323 (62.9)                                                              |
| Coronary artery disease                          | 1186 (11.2)                                                      | 482 (9.0)                                                            | 704 (13.3)                                                               |
| Heart failure                                    | 694 (6.5)                                                        | 327 (6.1)                                                            | 367 (7.0)                                                                |
| Hyperlipidemia                                   | 3101 (29.2)                                                      | 1387 (26.0)                                                          | 1714 (32.5)                                                              |
| Hypertension                                     | 3769 (35.5)                                                      | 1513 (28.3)                                                          | 2256 (42.7)                                                              |
| Diabetes                                         | 1966 (18.5)                                                      | 670 (12.5)                                                           | 1296 (24.6)                                                              |
| Asthma or chronic obstructive pulmonary disorder | 1970 (18.5)                                                      | 1036 (19.4)                                                          | 934 (17.7)                                                               |
| Chronic kidney disease                           | 1083 (10.2)                                                      | 436 (8.2)                                                            | 647 (12.3)                                                               |
| Cancer                                           | 802 (7.6)                                                        | 399 (7.5)                                                            | 403 (7.6)                                                                |

\*excluding 637 patients who tested negative and 287 patients who tested positive who did not have prior visits in the health system and did not have current data on demographics or comorbidities

**Appendix Table S2: Site of first positive test by admission status**

| <b>Location of first positive test</b> | <b>Not hospitalized, N=2538<br/>N (row %) or median (IQR)</b> | <b>Hospitalized, N=2741<br/>N (row %) or median<br/>(IQR)</b> |
|----------------------------------------|---------------------------------------------------------------|---------------------------------------------------------------|
| Outpatient                             | 1949 (96.2)                                                   | 78 (3.8)                                                      |
| Emergency department                   | 505 (16.1)                                                    | 2627 (83.9)                                                   |
| Inpatient                              | 3 (10.0)                                                      | 27 (90.0)                                                     |
| Missing                                | 81 (90.0)                                                     | 9 (10.0)                                                      |

**Appendix Table S3: Characteristics of patients by first test location**

| <b>Characteristic</b>                            | <b>First tested in emergency department, N=3,132<br/>N (column %) or median (IQR)</b> | <b>First tested in outpatient setting, N=2,027<br/>N (column %) or median (IQR)</b> |
|--------------------------------------------------|---------------------------------------------------------------------------------------|-------------------------------------------------------------------------------------|
| <b>Age, years</b>                                |                                                                                       |                                                                                     |
| 19-44                                            | 604 (19.3)                                                                            | 1201 (59.3)                                                                         |
| 45-54                                            | 498 (15.9)                                                                            | 377 (18.6)                                                                          |
| 55-64                                            | 680 (21.7)                                                                            | 323 (15.9)                                                                          |
| 65-74                                            | 669 (21.4)                                                                            | 106 (5.2)                                                                           |
| ≥75                                              | 681 (21.7)                                                                            | 20 (1.0)                                                                            |
| Male                                             | 1911 (61.0)                                                                           | 648 (32.0)                                                                          |
| <b>Race/ethnicity</b>                            |                                                                                       |                                                                                     |
| Non-Hispanic white                               | 1215 (38.8)                                                                           | 731 (36.1)                                                                          |
| Non-Hispanic African American                    | 470 (15.0)                                                                            | 350 (17.3)                                                                          |
| Asian                                            | 206 (6.6)                                                                             | 173 (8.5)                                                                           |
| Hispanic                                         | 866 (27.7)                                                                            | 440 (21.7)                                                                          |
| Other/ Multiracial                               | 241 (7.7)                                                                             | 150 (7.4)                                                                           |
| Unknown                                          | 134 (4.3)                                                                             | 183 (9.0)                                                                           |
| <b>Tobacco use</b>                               |                                                                                       |                                                                                     |
| Current                                          | 159 (5.1)                                                                             | 119 (5.9)                                                                           |
| Former                                           | 610 (19.5)                                                                            | 267 (13.2)                                                                          |
| Never, including passive exposure                | 1813 (57.9)                                                                           | 1378 (68.0)                                                                         |
| Unknown                                          | 550 (17.6)                                                                            | 263 (13.0)                                                                          |
| <b>Obesity</b>                                   |                                                                                       |                                                                                     |
| BMI <25 kg/m <sup>2</sup>                        | 1072 (34.2)                                                                           | 648 (32.0)                                                                          |
| BMI 25.0-29.9 kg/m <sup>2</sup>                  | 1004 (32.1)                                                                           | 527 (26.0)                                                                          |
| BMI 30.0-39.9 kg/m <sup>2</sup>                  | 197 (6.3)                                                                             | 106 (5.2)                                                                           |
| BMI ≥40 kg/m <sup>2</sup>                        | 731 (23.3)                                                                            | 642 (31.7)                                                                          |
| Unknown                                          | 128 (4.1)                                                                             | 104 (5.1)                                                                           |
| Any chronic condition*                           | 2383 (76.1)                                                                           | 862 (42.5)                                                                          |
| Any cardiovascular condition*                    | 2081 (66.4)                                                                           | 607 (29.9)                                                                          |
| Coronary artery disease                          | 630 (20.1)                                                                            | 62 (3.1)                                                                            |
| Heart failure                                    | 350 (11.2)                                                                            | 11 (0.5)                                                                            |
| Hyperlipidemia                                   | 1262 (40.3)                                                                           | 407 (20.1)                                                                          |
| Hypertension                                     | 1812 (57.9)                                                                           | 396 (19.5)                                                                          |
| Diabetes                                         | 1108 (35.4)                                                                           | 162 (8.0)                                                                           |
| Asthma or chronic obstructive pulmonary disorder | 619 (19.8)                                                                            | 292 (14.4)                                                                          |
| Chronic kidney disease                           | 602 (19.2)                                                                            | 38 (1.9)                                                                            |
| Cancer                                           | 304 (9.7)                                                                             | 85 (4.2)                                                                            |

**Appendix Table S4: Characteristics of patients with suspected Covid-19 in the emergency department (not tested)**

| <b>Characteristic</b>                            | <b>Suspected COVID-19, N=5,914<br/>N (%) or median (IQR)</b> |
|--------------------------------------------------|--------------------------------------------------------------|
| <b>Age, years</b>                                |                                                              |
| 19-44                                            | 3225 (54.5)                                                  |
| 45-54                                            | 1075 (18.2)                                                  |
| 55-64                                            | 897 (15.2)                                                   |
| 65-74                                            | 457 (7.7)                                                    |
| ≥75                                              | 260 (4.4)                                                    |
| Male                                             | 3088 (52.2)                                                  |
| <b>Race/ethnicity</b>                            |                                                              |
| Non-Hispanic white                               | 1539 (26.0)                                                  |
| Non-Hispanic African American                    | 924 (15.6)                                                   |
| Asian                                            | 319 (5.4)                                                    |
| Hispanic                                         | 2297 (38.8)                                                  |
| Other/ Multiracial                               | 471 (8.0)                                                    |
| Unknown                                          | 364 (6.2)                                                    |
| <b>Tobacco use</b>                               |                                                              |
| Never                                            | 2984 (50.5)                                                  |
| Former                                           | 667 (11.3)                                                   |
| Current                                          | 722 (12.2)                                                   |
| Unknown                                          | 1541 (26.1)                                                  |
| <b>Obesity</b>                                   |                                                              |
| BMI <25 kg/m <sup>2</sup>                        | 1256 (21.2)                                                  |
| BMI 25.0-29.9 kg/m <sup>2</sup>                  | 1506 (25.5)                                                  |
| BMI 30.0-39.9 kg/m <sup>2</sup>                  | 1246 (21.1)                                                  |
| BMI ≥40 kg/m <sup>2</sup>                        | 225 (3.8)                                                    |
| Unknown                                          | 1681 (28.4)                                                  |
| Any chronic condition*                           | 2503 (42.3)                                                  |
| Any cardiovascular condition*                    | 1780 (30.1)                                                  |
| Coronary artery disease                          | 231 (3.9)                                                    |
| Heart failure                                    | 102 (1.7)                                                    |
| Hyperlipidemia                                   | 1039 (17.6)                                                  |
| Hypertension                                     | 1365 (23.1)                                                  |
| Diabetes                                         | 686 (11.6)                                                   |
| Asthma or chronic obstructive pulmonary disorder | 887 (15.0)                                                   |
| Chronic kidney disease                           | 139 (2.4)                                                    |
| Cancer                                           | 238 (4.0)                                                    |

**Appendix Table S5: Risk of hospitalization, including ED suspected cases in not hospitalized group**

| Characteristic                                   | Risk of hospitalization<br>Odds ratio (95% CI) | p      | Average marginal effect |
|--------------------------------------------------|------------------------------------------------|--------|-------------------------|
| Week*                                            |                                                |        |                         |
| Age, years                                       |                                                |        |                         |
| 19-44                                            | Reference                                      |        |                         |
| 45-54                                            | 2.00 (1.70-2.35)                               | <0.001 | 8%                      |
| 55-64                                            | 3.03 (2.58-3.57)                               | <0.001 | 14%                     |
| 65-74                                            | 6.26 (5.17-7.59)                               | <0.001 | 26%                     |
| ≥75                                              | 14.59 (11.56-18.45)                            | <0.001 | 41%                     |
| Male                                             | 2.10 (1.87-2.35)                               | <0.001 | 9%                      |
| Race/ethnicity                                   |                                                |        |                         |
| Non-Hispanic white                               | Reference                                      |        |                         |
| Non-Hispanic African American                    | 0.65 (0.55-0.78)                               | <0.001 | -5%                     |
| Asian                                            | 1.26 (0.99-1.59)                               | 0.058  | 3%                      |
| Hispanic                                         | 0.97 (0.84-1.12)                               | 0.694  | 0%                      |
| Other/ Multiracial                               | 1.41 (1.14-1.75)                               | 0.002  | 4%                      |
| Unknown                                          | 0.89 (0.68-1.15)                               | 0.376  | -1%                     |
| Tobacco use                                      |                                                |        |                         |
| Never                                            | Reference                                      |        |                         |
| Former                                           | 0.73 (0.62-0.86)                               | <0.001 | -4%                     |
| Current                                          | 0.45 (0.36-0.57)                               | <0.001 | -9%                     |
| Unknown                                          | 1.08 (0.92-1.26)                               | 0.332  | 1%                      |
| Obesity                                          |                                                |        |                         |
| BMI <25 kg/m <sup>2</sup>                        | Reference                                      |        |                         |
| BMI 25.0-29.9 kg/m <sup>2</sup>                  | 1.16 (1.00-1.35)                               | 0.058  | 2%                      |
| BMI 30.0-39.9 kg/m <sup>2</sup>                  | 1.51 (1.29-1.76)                               | <0.001 | 5%                      |
| BMI ≥40 kg/m <sup>2</sup>                        | 2.24 (1.74-2.88)                               | <0.001 | 11%                     |
| Unknown                                          | 0.16 (0.12-0.22)                               | <0.001 | -16%                    |
| Coronary artery disease                          | 1.28 (1.04-1.56)                               | 0.018  | 3%                      |
| Heart failure                                    | 2.56 (1.90-3.48)                               | <0.001 | 11%                     |
| Hyperlipidemia                                   | 0.73 (0.63-0.84)                               | <0.001 | -4%                     |
| Hypertension                                     | 1.68 (1.47-1.93)                               | <0.001 | 6%                      |
| Diabetes                                         | 1.72 (1.49-1.99)                               | <0.001 | 7%                      |
| Asthma or chronic obstructive pulmonary disorder | 0.93 (0.80-1.10)                               | 0.407  | -1%                     |
| Chronic kidney disease                           | 3.13 (2.51-3.91)                               | <0.001 | 14%                     |
| Cancer                                           | 1.09 (0.87-1.36)                               | 0.443  | 1%                      |

\*included in model, but ORs too unreliable to display because of time variation in testing capability. In weeks 10-11 only 34 non-hospitalized and 65 hospitalized patients tested positive. Adding the ED non-tested population increases the non-hospitalized group to 1,782, artificially reducing the apparent hospitalization rate and skewing ORs.

**Appendix Table S6: Risk of hospitalization, including only patients first tested in the ED**

| Characteristic                                   | Risk of hospitalization<br>Odds ratio (95% CI) | p      | Average marginal effect |
|--------------------------------------------------|------------------------------------------------|--------|-------------------------|
| <b>Week</b>                                      |                                                |        |                         |
| 9 or 10                                          | Reference                                      |        |                         |
| 11                                               | 0.92 (0.56-1.49)                               | 0.735  | -2%                     |
| 12                                               | 6.33 (3.77-10.60)                              | <0.001 | 24%                     |
| 13                                               | 7.25 (4.33-12.10)                              | <0.001 | 25%                     |
| 14                                               | 8.30 (4.50-15.49)                              | <0.001 | 26%                     |
| <b>Age, years</b>                                |                                                |        |                         |
| 19-44                                            | Reference                                      |        |                         |
| 45-54                                            | 1.57 (1.13-2.17)                               | 0.007  | 6%                      |
| 55-64                                            | 2.16 (1.56-3.02)                               | <0.001 | 9%                      |
| 65-74                                            | 3.50 (2.36-5.24)                               | <0.001 | 14%                     |
| ≥75                                              | 7.56 (4.54-12.96)                              | <0.001 | 19%                     |
| Male                                             | 1.61 (1.27-2.04)                               | <0.001 | 5%                      |
| <b>Race/ethnicity</b>                            |                                                |        |                         |
| Non-Hispanic white                               | Reference                                      |        |                         |
| Non-Hispanic African American                    | 0.88 (0.65-1.19)                               | 0.405  | -1%                     |
| Asian                                            | 0.54 (0.38-0.77)                               | <0.001 | -6%                     |
| Hispanic                                         | 1.53 (0.92-2.61)                               | 0.108  | 4%                      |
| Other/ Multiracial                               | 1.65 (1.01-2.79)                               | 0.052  | 4%                      |
| Unknown                                          | 1.22 (0.69-2.20)                               | 0.501  | 2%                      |
| <b>Tobacco use</b>                               |                                                |        |                         |
| Never                                            | Reference                                      |        |                         |
| Former                                           | 0.84 (0.60-1.18)                               | 0.308  | -2%                     |
| Current                                          | 0.84 (0.50-1.47)                               | 0.528  | -2%                     |
| Unknown                                          | 0.70 (0.52-0.96)                               | 0.025  | -3%                     |
| <b>Obesity</b>                                   |                                                |        |                         |
| BMI <25 kg/m <sup>2</sup>                        | Reference                                      |        |                         |
| BMI 25.0-29.9 kg/m <sup>2</sup>                  | 1.17 (0.85-1.61)                               | 0.324  | 2%                      |
| BMI 30.0-39.9 kg/m <sup>2</sup>                  | 1.38 (0.99-1.93)                               | 0.054  | 3%                      |
| BMI ≥40 kg/m <sup>2</sup>                        | 2.28 (1.31-4.13)                               | 0.005  | 7%                      |
| Unknown                                          | 0.21 (0.12-0.35)                               | <0.001 | -21%                    |
| Coronary artery disease                          | 0.97 (0.64-1.49)                               | 0.885  | 0%                      |
| Heart failure                                    | 4.34 (2.04-10.77)                              | <0.001 | 14%                     |
| Hyperlipidemia                                   | 0.75 (0.56-1.01)                               | 0.058  | -3%                     |
| Hypertension                                     | 1.61 (1.20-2.15)                               | 0.001  | 5%                      |
| Diabetes                                         | 1.30 (0.96-1.77)                               | 0.087  | 3%                      |
| Asthma or chronic obstructive pulmonary disorder | 0.78 (0.56-1.09)                               | 0.135  | -2%                     |
| Chronic kidney disease                           | 1.56 (1.01-2.47)                               | 0.050  | 4%                      |
| Cancer                                           | 0.99 (0.62-1.63)                               | 0.981  | 0%                      |
